# Supplementary material
Source: PubMed Central journal article supplement (PMC6930975)
Supplement: NIHMS1536179-supplement-1.pdf [file NIHMS1536179-supplement-1.pdf]

| Supplemental Table 1. Neonatal Demographic Information with Follow-up Data at 24-months |                |
|-----------------------------------------------------------------------------------------|----------------|
| Variable                                                                                | Mean (SD)      |
| Postmenstrual age at scan, wk                                                           | 42.0 (2.2)     |
| Gestational age at birth, wk                                                            | 39.1 (1.1)     |
| Birth weight, g                                                                         | 3360.3 (352.6) |
| Birth length, cm                                                                        | 51.1 (2.4)     |
| Head Circumference, cm                                                                  | 34.4 (1.0)     |
| 5 minute Apgar Score                                                                    | 9.1 (0.2)      |
| Male, n (%)                                                                             | 8 (47.19%)     |
| Abbreviations: cm, centimeters; g, grams; wk, weeks; SD, standard deviation.            |                |

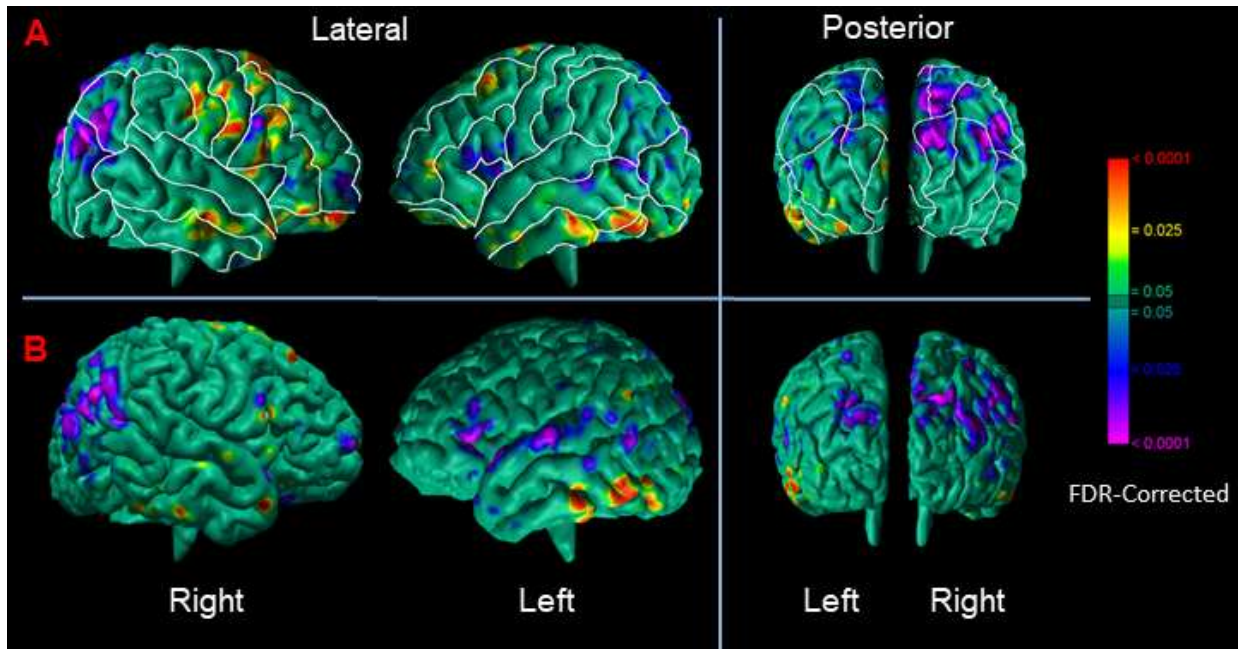

**Supplemental Figure 1. Comparison of the Correlation of Cerebral Surface Measures with SES coded in two different ways, via Hollingshead and Occupation alone**
